# Supplementary material for: Seasonality and Geography Have a Greater Influence than the Use of Chlorine-Based Cleaning Agents on the Microbiota of Bulk Tank Raw Milk
Source: PubMed Central journal article supplement (PMC8552886; doi:10.1128/aem.01081-21), 2021-10-28
Supplement: aem.01081-21-s0001.pdf [file aem.01081-21-s0001.pdf]

## SUPPLEMENTAL MATERIAL

**TABLE S1.** Sample numbers for each cleaning method according to sampling location (A to D), where samples are from farms that used chlorine-free agents for their bulk tank alone (BTCF), farms that used chlorine-based agents in their cleaning routine (C) and farms that used a chlorine-free cleaning routine (CF).

| Cleaning Methods | Sampling Location |    |    |    | Total |
|------------------|-------------------|----|----|----|-------|
|                  | A                 | B  | C  | D  |       |
| C                | 24                | 23 | 4  | -  | 51    |
| CF               | 17                | 16 | 35 | 24 | 92    |
| BTCF             | 4                 | 6  | 18 | -  | 28    |
| Total            | 45                | 45 | 57 | 24 | 171   |

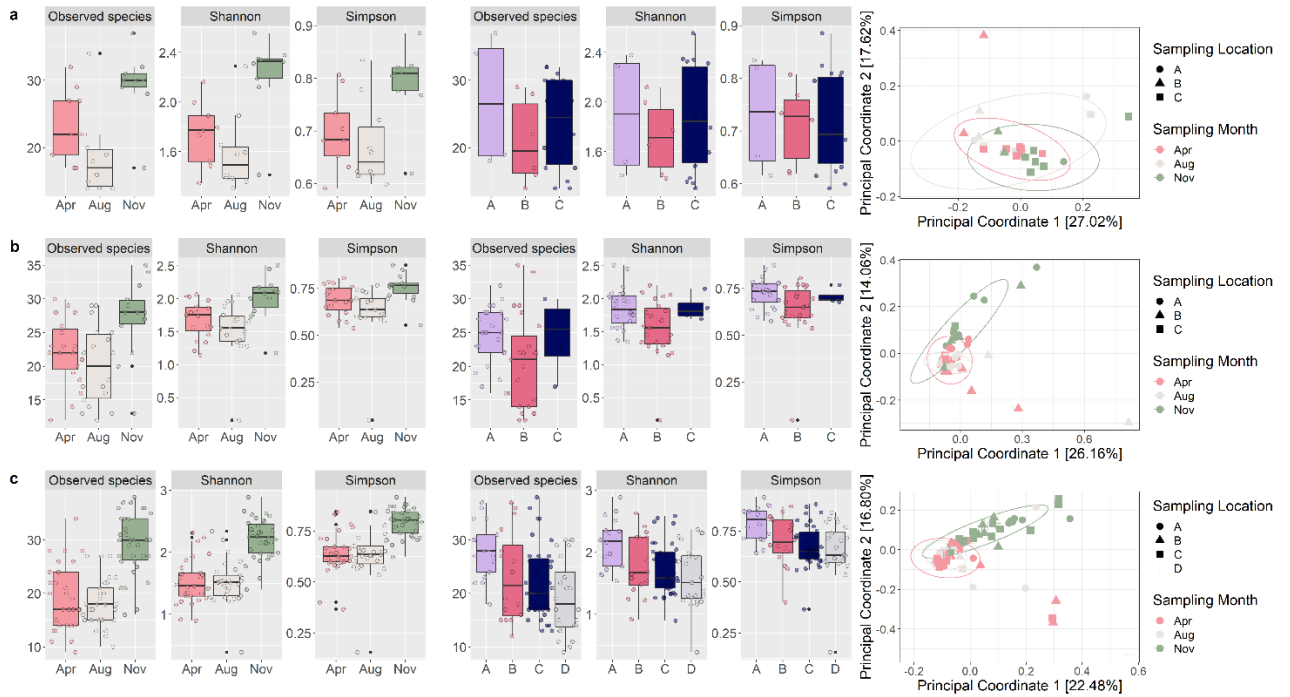

**FIG S1.** Alpha and beta diversity of raw milk stratified by cleaning method. Samples are from (a) farms that used chlorine-free agents for their bulk tank alone (BTCF), (b) farms that used chlorine-based agents in their cleaning routine (C) and (c) farms that used a chlorine-free cleaning routine (CF). Samples are from farms from 3 different sampling months – April (Apr), August (Aug) and November (Nov) from 4 different sampling locations (A to D).

**TABLE S2.** PERMANOVA analysis of taxonomic composition and functional properties (based on results from SUPER-FOCUS) of the bulk tank milk microbiota stratified by cleaning method. Samples are from farms that used chlorine-free agents for their bulk tank alone (BTCF), farms that used chlorine-based agents in their cleaning routine (C) and farms that used a chlorine-free cleaning routine (CF).

| <b>Cleaning Method</b> |                   | <b>R<sup>2</sup></b> | <b>P value</b> |
|------------------------|-------------------|----------------------|----------------|
| BTCF                   | Sampling month    | 0.167                | 0.001          |
|                        | Sampling location | 0.150                | 0.005          |
|                        | Residuals         | 0.684                |                |
| C                      | Sampling month    | 0.099                | 0.001          |
|                        | Sampling location | 0.047                | 0.201          |
|                        | Residuals         | 0.853                |                |
| CF                     | Sampling month    | 0.124                | 0.001          |
|                        | Sampling location | 0.099                | 0.001          |
|                        | Residuals         | 0.777                |                |

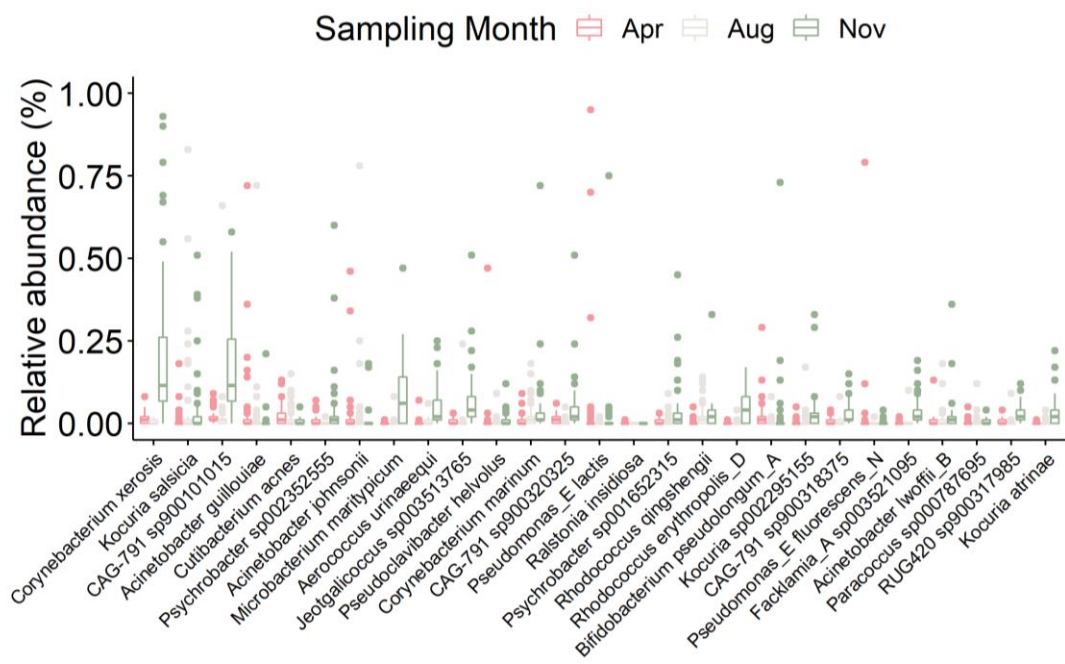

**b**

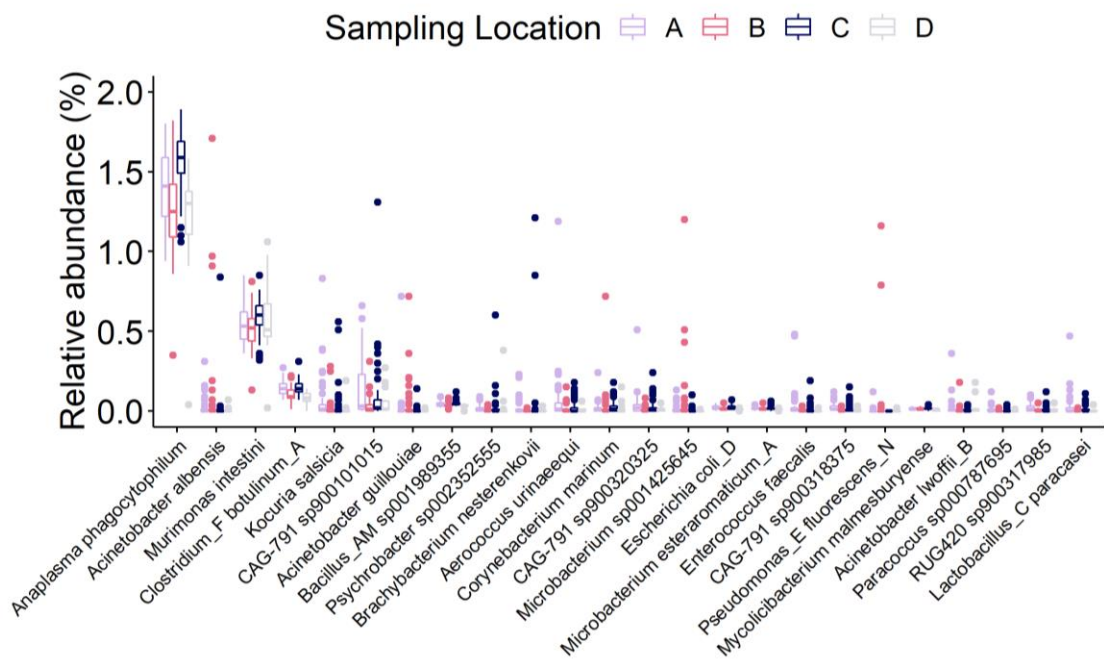

**FIG S2.** Significantly differential relative abundances of species that differed between (a) sampling month – April (Apr), August (Aug) and November (Nov), and (b) sampling location (locations A to D).

**TABLE S3.** Relative abundances of species that differed by sampling month – April (Apr), August (Aug) and November (Nov).

| Species                               | Sampling Month |       |       |
|---------------------------------------|----------------|-------|-------|
|                                       | Apr            | Aug   | Nov   |
| <i>Acinetobacter guillouiae</i>       | 0.188          | 0.020 | 0.005 |
| <i>Acinetobacter johnsonii</i>        | 0.020          | 0.071 | 0.008 |
| <i>Acinetobacter lwoffii_B</i>        | 0.005          | 0.012 | 0.022 |
| <i>Aerococcus urinaeequi</i>          | 0.024          | 0.004 | 0.054 |
| <i>Bifidobacterium pseudolongum_A</i> | 0.021          | 0.002 | 0.021 |
| CAG-791 sp900101015                   | 0.021          | 0.023 | 0.195 |
| CAG-791 sp900318375                   | 0.006          | 0.005 | 0.030 |
| CAG-791 sp900320325                   | 0.009          | 0.003 | 0.048 |
| <i>Corynebacterium marinum</i>        | 0.009          | 0.022 | 0.036 |
| <i>Corynebacterium xerosis</i>        | 0.013          | 0.023 | 0.228 |
| <i>Cutibacterium acnes</i>            | 0.020          | 0.017 | 0.005 |
| <i>Facklamia_A</i> sp003521095        | 0.001          | 0.002 | 0.035 |
| <i>Jeotgalicoccus</i> sp003513765     | 0.003          | 0.005 | 0.066 |
| <i>Kocuria atrinae</i>                | 0.001          | 0.001 | 0.030 |
| <i>Kocuria salsicia</i>               | 0.008          | 0.108 | 0.123 |
| <i>Kocuria</i> sp002295155            | 0.002          | 0.006 | 0.031 |
| <i>Microbacterium maritypicum</i>     | 0.000          | 0.002 | 0.084 |
| <i>Paracoccus</i> sp000787695         | 0.002          | 0.004 | 0.004 |
| <i>Pseudoclavibacter helvolus</i>     | 0.011          | 0.003 | 0.010 |
| <i>Pseudomonas_E fluorescens_N</i>    | 0.038          | 0.000 | 0.004 |
| <i>Pseudomonas_E lactis</i>           | 0.038          | 0.001 | 0.016 |
| <i>Psychrobacter</i> sp001652315      | 0.004          | 0.004 | 0.038 |
| <i>Psychrobacter</i> sp002352555      | 0.009          | 0.000 | 0.088 |
| <i>Ralstonia insidiosa</i>            | 0.001          | 0.000 | 0.000 |
| <i>Rhodococcus erythropolis_D</i>     | 0.000          | 0.001 | 0.046 |
| <i>Rhodococcus qingshengii</i>        | 0.002          | 0.021 | 0.025 |
| RUG420 sp900317985                    | 0.004          | 0.002 | 0.029 |

**TABLE S4.** Relative abundances of species that differed by sampling location (locations A to D).

| Species                                 | Sampling Location |       |       |       |
|-----------------------------------------|-------------------|-------|-------|-------|
|                                         | A                 | B     | C     | D     |
| <i>Acinetobacter albensis</i>           | 0.025             | 0.270 | 0.016 | 0.213 |
| <i>Acinetobacter guillouiae</i>         | 0.020             | 0.242 | 0.005 | 0.001 |
| <i>Acinetobacter lwoffii_B</i>          | 0.020             | 0.008 | 0.009 | 0.018 |
| <i>Aerococcus urinaeequi</i>            | 0.062             | 0.012 | 0.021 | 0.008 |
| <i>Anaplasma phagocytophilum</i>        | 1.414             | 1.252 | 1.561 | 1.208 |
| <i>Bacillus_AM</i> sp001989355          | 0.042             | 0.034 | 0.048 | 0.032 |
| <i>Brachybacterium nesterenkovi</i>     | 0.074             | 0.002 | 0.038 | 0.001 |
| CAG-791 sp900101015                     | 0.139             | 0.032 | 0.086 | 0.045 |
| CAG-791 sp900318375                     | 0.024             | 0.005 | 0.016 | 0.005 |
| CAG-791 sp900320325                     | 0.037             | 0.008 | 0.021 | 0.010 |
| <i>Clostridium_F botulinum_A</i>        | 0.145             | 0.106 | 0.147 | 0.079 |
| <i>Corynebacterium marinum</i>          | 0.018             | 0.028 | 0.025 | 0.012 |
| <i>Enterococcus faecalis</i>            | 0.036             | 0.004 | 0.008 | 0.001 |
| <i>Escherichia coli_D</i>               | 0.021             | 0.015 | 0.020 | 0.009 |
| <i>Kocuria salsicia</i>                 | 0.243             | 0.018 | 0.029 | 0.010 |
| <i>Lactobacillus_C paracasei</i>        | 0.031             | 0.001 | 0.008 | 0.002 |
| <i>Microbacterium esteraromaticum_A</i> | 0.017             | 0.015 | 0.021 | 0.011 |
| <i>Microbacterium</i> sp001425645       | 0.010             | 0.058 | 0.004 | 0.001 |
| <i>Murimonas intestini</i>              | 0.544             | 0.517 | 0.591 | 0.585 |
| <i>Mycolicibacterium malmesburyense</i> | 0.014             | 0.011 | 0.016 | 0.007 |
| <i>Paracoccus</i> sp000787695           | 0.008             | 0.001 | 0.003 | 0.001 |

---

|                                    |       |       |       |       |
|------------------------------------|-------|-------|-------|-------|
| <i>Pseudomonas_E fluorescens_N</i> | 0.004 | 0.047 | 0.000 | 0.002 |
| <i>Psychrobacter</i> sp002352555   | 0.013 | 0.073 | 0.021 | 0.019 |
| RUG420 sp900317985                 | 0.022 | 0.004 | 0.012 | 0.006 |

---

**TABLE S5.** Climate data retrieved from the Irish Meteorological Service from the sampling days at the four sampling locations. Samples are from farms from 3 different sampling months – April (Apr), August (Aug) and November (Nov) from 4 different sampling locations (A to D).

| <b>Sampling Month</b> | <b>Location</b> | <b>Rainfall (mm)</b> | <b>Max Temp (°C)</b> | <b>Min Temp (°C)</b> | <b>Grass Min Temp (°C)</b> | <b>Mean Wind Speed (knots)</b> |
|-----------------------|-----------------|----------------------|----------------------|----------------------|----------------------------|--------------------------------|
| Apr                   | A               | 2.5                  | 13.1                 | 9.9                  | 8.1                        | 11                             |
|                       | B               | 3.9                  | 12.6                 | 7.3                  | 5                          | 10.6                           |
|                       | C               | 7.2                  | 14.2                 | 7.5                  | 4.3                        | 6                              |
|                       | D               | 3.7                  | 13.4                 | 7.6                  | 6.5                        | 7.2                            |
| Aug                   | A               | 0.1                  | 17.4                 | 10.7                 | 4.8                        | 6.8                            |
|                       | B               | 0                    | 18.6                 | 10.5                 | 6.4                        | 6.1                            |
|                       | C               | 0                    | 21.9                 | 8.5                  | 3.9                        | 4.4                            |
|                       | D               | 0                    | 20.3                 | 7.8                  | 5                          | 3.5                            |
| Nov                   | A               | 8.2                  | 9.6                  | 3.7                  | 3.3                        | 18.6                           |
|                       | B               | 15.2                 | 6.0                  | 2.2                  | 1                          | 9.8                            |
|                       | C               | 18.4                 | 5.7                  | 0.1                  | -1.6                       | 4.4                            |
|                       | D               | 15.8                 | 5.2                  | 0.6                  | -2.5                       | 6.5                            |



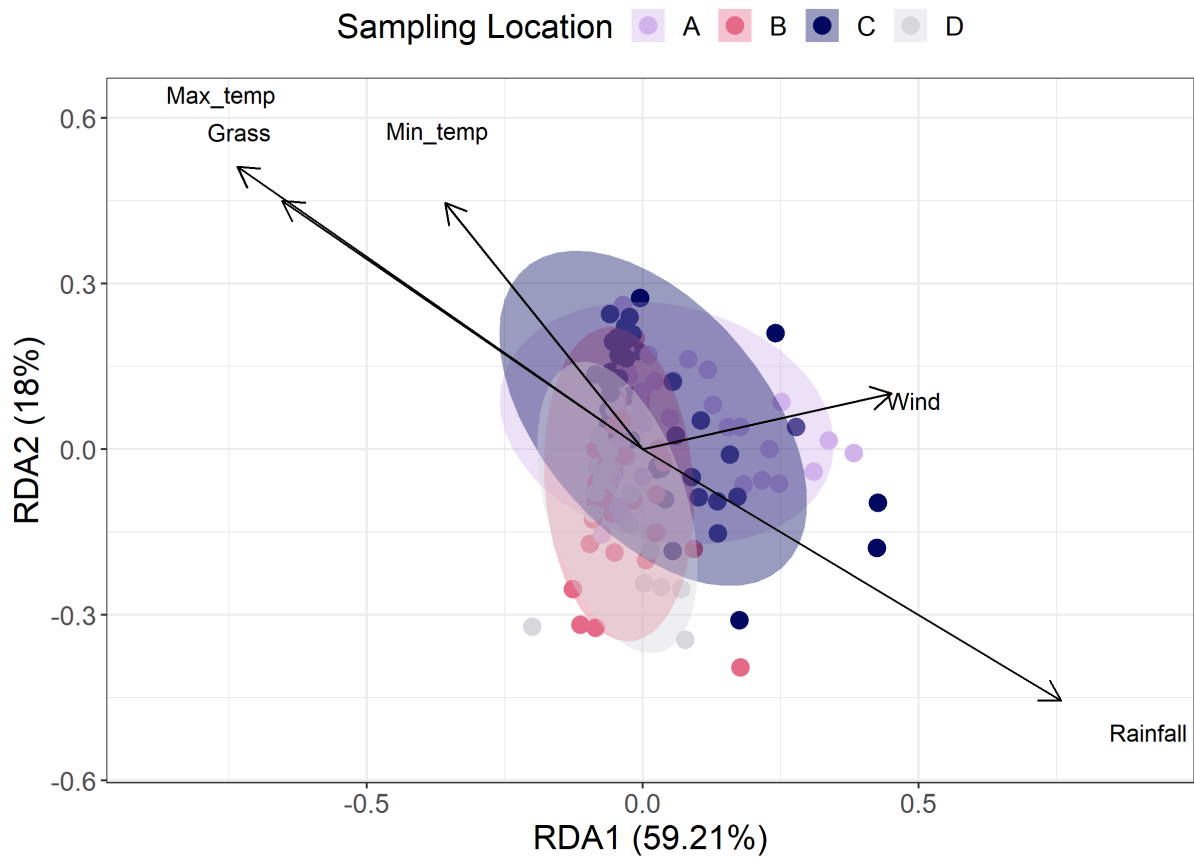

**FIG S3.** Redundancy analysis of the relationship between climate factors and sampling locations of the bulk tank milk microbiota. The variables are described in Table S5. Ellipses represent clustering by the 4 different sampling locations (A to D).

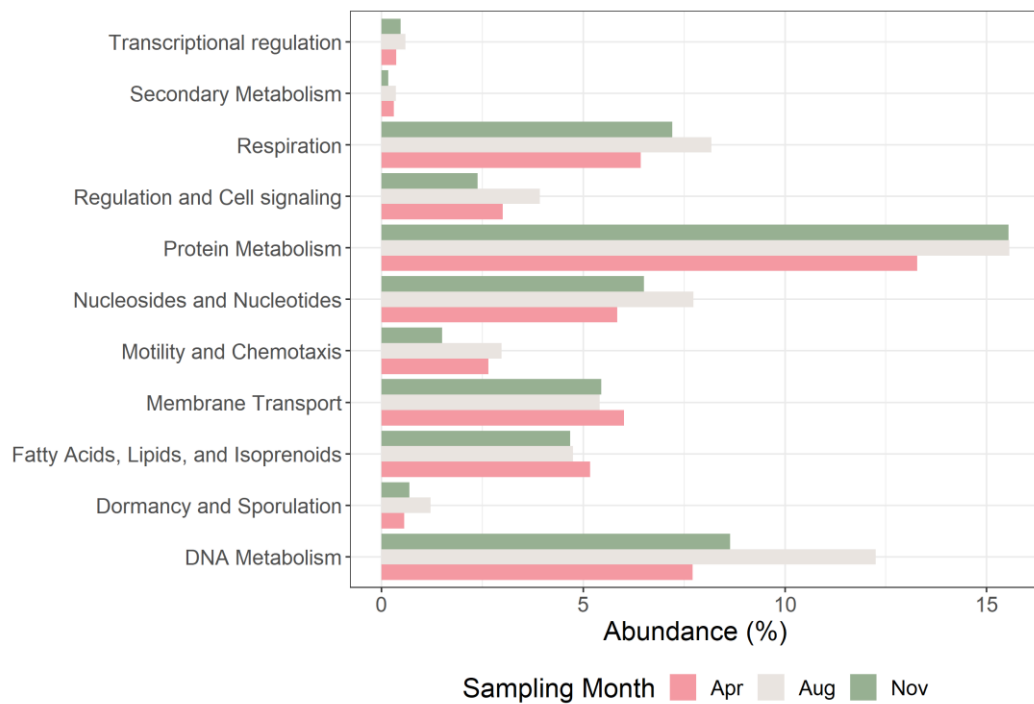

**FIG S4.** Significantly differential abundances of functions that differed between the sampling months, April (Apr), August (Aug) and November (Nov).

**TABLE S6.** Relative abundances of genes assigned to significant functional classifications of SUPER-FOCUS subsystem levels 1-3 between sampling months – April (Apr), August (Aug) and November (Nov).

| Subsystem Level 1           | Subsystem Level 2                           | Subsystem Level 3                            | Sampling Month |        |        |
|-----------------------------|---------------------------------------------|----------------------------------------------|----------------|--------|--------|
|                             |                                             |                                              | Apr            | Aug    | Nov    |
| Amino Acids and Derivatives | Alanine, serine, and glycine                | -                                            | 0.658          | 0.764  | 0.814  |
| Amino Acids and Derivatives | Alanine, serine, and glycine                | Glycine and Serine Utilization               | 0.258          | 0.336  | 0.338  |
| Amino Acids and Derivatives | Alanine, serine, and glycine                | Glycine cleavage system                      | 0.085          | 0.090  | 0.130  |
| Amino Acids and Derivatives | Arginine; urea cycle, polyamines            | Urea decomposition                           | 0.155          | 0.214  | 0.097  |
| Amino Acids and Derivatives | Branched-chain amino acids                  | -                                            | 1.537          | 1.461  | 1.242  |
| Amino Acids and Derivatives | Lysine, threonine, methionine, and cysteine | Methionine Degradation                       | 0.335          | 0.322  | 0.443  |
| Carbohydrates               | -                                           | -                                            | 20.429         | 19.438 | 19.236 |
| Carbohydrates               | -                                           | Putative sugar ABC transporter (ytf cluster) | 0.049          | 0.017  | 0.019  |
| Carbohydrates               | Central carbohydrate metabolism             | Dehydrogenase complexes                      | 0.323          | 0.263  | 0.232  |
| Carbohydrates               | Central carbohydrate metabolism             | Glycolysis and Gluconeogenesis               | 0.417          | 0.463  | 0.603  |

|                              |                                 |                                                        |       |       |       |
|------------------------------|---------------------------------|--------------------------------------------------------|-------|-------|-------|
| Carbohydrates                | Central carbohydrate metabolism | Pyruvate:ferredoxin oxidoreductase                     | 0.110 | 0.131 | 0.175 |
| Carbohydrates                | CO2 fixation                    | -                                                      | 0.473 | 0.407 | 0.331 |
| Carbohydrates                | CO2 fixation                    | Photorespiration (oxidative C2 cycle)                  | 0.104 | 0.086 | 0.049 |
| Carbohydrates                | Di- and oligosaccharides        | Fructooligosaccharides(FOS) and Raffinose Utilization  | 0.237 | 0.209 | 0.297 |
| Carbohydrates                | Di- and oligosaccharides        | Lactose utilization                                    | 0.134 | 0.156 | 0.190 |
| Carbohydrates                | Fermentation                    | Acetone Butanol Ethanol Synthesis                      | 0.002 | 0.001 | 0.003 |
| Carbohydrates                | Monosaccharides                 | Deoxyribose and Deoxynucleoside Catabolism             | 0.213 | 0.194 | 0.276 |
| Carbohydrates                | One-carbon Metabolism           | millsd methanogenesis                                  | 0.007 | 0.009 | 0.022 |
| Carbohydrates                | Organic acids                   | Glycerate metabolism                                   | 0.111 | 0.083 | 0.109 |
| Carbohydrates                | Polysaccharides                 | -                                                      | 0.645 | 0.794 | 0.833 |
| Carbohydrates                | Sugar alcohols                  | Glycerol fermentation to 1,3-propanediol               | 0.011 | 0.009 | 0.032 |
| Carbohydrates                | Sugar alcohols                  | Propanediol utilization                                | 0.019 | 0.011 | 0.024 |
| Cell Division and Cell Cycle | -                               | Control of cell elongation - division cycle in Bacilli | 0.057 | 0.031 | 0.036 |

|                             |                                                                   |                                         |       |       |       |
|-----------------------------|-------------------------------------------------------------------|-----------------------------------------|-------|-------|-------|
| Cell Wall and Capsule       | Capsular and extracellular polysacchrides                         | CMP-N-acetylneuraminate Biosynthesis    | 0.027 | 0.021 | 0.037 |
| Cell Wall and Capsule       | Capsular and extracellular polysacchrides                         | Phosphorylcholine incorporation in LPS  | 0.006 | 0.007 | 0.012 |
| Cell Wall and Capsule       | Capsular and extracellular polysacchrides                         | Polysaccharide deacetylases             | 0.016 | 0.021 | 0.035 |
| Cell Wall and Capsule       | Gram-Positive cell wall components                                | D-Alanyl Lipoteichoic Acid Biosynthesis | 0.012 | 0.004 | 0.004 |
| Cell Wall and Capsule       | Gram-Positive cell wall components                                | Teichuronic acid biosynthesis           | 0.017 | 0.018 | 0.041 |
| Clustering-based subsystems | -                                                                 | CBSS-262719.3.peg.410                   | 0.075 | 0.049 | 0.104 |
| Clustering-based subsystems | -                                                                 | LMPTP YwIE cluster                      | 0.080 | 0.080 | 0.116 |
| Clustering-based subsystems | -                                                                 | Sporulation-related Hypotheticals       | 0.014 | 0.013 | 0.022 |
| Clustering-based subsystems | contains Thr-tRNA-syn, pyridoxine biosyn, lipid A biosyn, 3 hypos | -                                       | 0.007 | 0.020 | 0.038 |
| Clustering-based subsystems | contains Thr-tRNA-syn, pyridoxine biosyn, lipid A biosyn, 3 hypos | CBSS-1806.1.peg.1285                    | 0.007 | 0.020 | 0.038 |
| Clustering-based subsystems | Protein export?                                                   | -                                       | 0.253 | 0.221 | 0.334 |

|                                                  |                                                                  |                                             |       |       |       |
|--------------------------------------------------|------------------------------------------------------------------|---------------------------------------------|-------|-------|-------|
| Clustering-based subsystems                      | Protein export?                                                  | CBSS-393121.3.peg.2760                      | 0.253 | 0.221 | 0.334 |
| Clustering-based subsystems                      | Putative Isoquinoline 1-oxidoreductase subunit                   | -                                           | 0.037 | 0.014 | 0.017 |
| Clustering-based subsystems                      | Putative Isoquinoline 1-oxidoreductase subunit                   | CBSS-314267.3.peg.390                       | 0.037 | 0.014 | 0.017 |
| Clustering-based subsystems                      | Putrescine/GABA utilization cluster-temporal,to add to SSs       | -                                           | 0.050 | 0.037 | 0.019 |
| Clustering-based subsystems                      | Putrescine/GABA utilization cluster-temporal,to add to SSs       | GABA and putrescine metabolism from cluters | 0.050 | 0.037 | 0.019 |
| Clustering-based subsystems                      | recX and regulatory cluster                                      | -                                           | 0.012 | 0.003 | 0.013 |
| Clustering-based subsystems                      | Sulfatases and sulfatase modifying factor 1 (and a hypothetical) | -                                           | 0.110 | 0.049 | 0.056 |
| Clustering-based subsystems                      | Sulfatases and sulfatase modifying factor 1 (and a hypothetical) | Sulfatases and sulfatase modifying factor 1 | 0.110 | 0.049 | 0.056 |
| Cofactors, Vitamins, Prosthetic Groups, Pigments | Coenzyme M                                                       | -                                           | 0.009 | 0.003 | 0.012 |
| Cofactors, Vitamins, Prosthetic Groups, Pigments | Folate and pterines                                              | p-Aminobenzoyl-Glutamate Utilization        | 0.027 | 0.013 | 0.038 |

|                                                  |                      |                                            |       |       |       |
|--------------------------------------------------|----------------------|--------------------------------------------|-------|-------|-------|
| Cofactors, Vitamins, Prosthetic Groups, Pigments | Riboflavin, FMN, FAD | Flavodoxin                                 | 0.035 | 0.013 | 0.034 |
| Cofactors, Vitamins, Prosthetic Groups, Pigments | Tetrapyrroles        | Cobalamin                                  | 0.107 | 0.077 | 0.129 |
| DNA Metabolism                                   | -                    | -                                          | 5.762 | 6.259 | 6.506 |
| DNA Metabolism                                   | DNA repair           | -                                          | 3.087 | 3.426 | 3.502 |
| DNA Metabolism                                   | DNA repair           | DNA repair, UvrABC system                  | 0.663 | 0.695 | 0.853 |
| DNA Metabolism                                   | DNA replication      | -                                          | 1.561 | 1.672 | 1.805 |
| DNA Metabolism                                   | DNA replication      | DNA replication, archaeal                  | 0.050 | 0.046 | 0.067 |
| DNA Metabolism                                   | DNA replication      | DNA topoisomerases, Type II, ATP-dependent | 0.292 | 0.355 | 0.408 |
| Dormancy and Sporulation                         | -                    | -                                          | 0.212 | 0.241 | 0.279 |
| Dormancy and Sporulation                         | -                    | Spore Core Dehydration                     | 0.015 | 0.008 | 0.026 |
| Dormancy and Sporulation                         | -                    | Sporulation Cluster                        | 0.026 | 0.029 | 0.037 |
| Fatty Acids, Lipids, and Isoprenoids             | -                    | -                                          | 3.329 | 3.158 | 2.930 |
| Fatty Acids, Lipids, and Isoprenoids             | Fatty acids          | -                                          | 1.744 | 1.536 | 1.356 |
| Fatty Acids, Lipids, and Isoprenoids             | Fatty acids          | Fatty Acid Biosynthesis FASII              | 1.203 | 1.057 | 0.936 |

|                                      |                                              |                                                                  |       |       |       |
|--------------------------------------|----------------------------------------------|------------------------------------------------------------------|-------|-------|-------|
| Fatty Acids, Lipids, and Isoprenoids | Isoprenoids                                  | Isoprenoid Biosynthesis                                          | 0.176 | 0.203 | 0.230 |
| Fatty Acids, Lipids, and Isoprenoids | Isoprenoids                                  | Isoprenoid Biosynthesis: Interconversions                        | 0.018 | 0.010 | 0.030 |
| Iron acquisition and metabolism      | -                                            | Heme, hemin uptake and utilization systems in GramPositives      | 0.113 | 0.094 | 0.154 |
| Iron acquisition and metabolism      | Siderophores                                 | Petrobactin-mediated iron uptake system                          | 0.018 | 0.018 | 0.052 |
| Iron acquisition and metabolism      | Siderophores                                 | Siderophore Pyoverdine                                           | 0.123 | 0.057 | 0.042 |
| Membrane Transport                   | -                                            | -                                                                | 3.665 | 3.410 | 3.105 |
| Membrane Transport                   | Sugar Phosphotransferase Systems, PTS        | -                                                                | 0.033 | 0.032 | 0.025 |
| Membrane Transport                   | -                                            | Transport of Manganese                                           | 0.106 | 0.071 | 0.035 |
| Metabolism of Aromatic Compounds     | Metabolism of central aromatic intermediates | N-heterocyclic aromatic compound degradation                     | 0.035 | 0.014 | 0.016 |
| Miscellaneous                        | -                                            | EC 2.7.1.- Phosphotransferases with an alcohol group as acceptor | 0.043 | 0.024 | 0.030 |



|                             |                                       |                                                    |       |       |       |
|-----------------------------|---------------------------------------|----------------------------------------------------|-------|-------|-------|
| Miscellaneous               | -                                     | EC 6.3.4.- Ligases that form carbon-nitrogen bonds | 0.265 | 0.216 | 0.275 |
| Miscellaneous               | -                                     | Nicotinate catabolism, anaerobic                   | 0.005 | 0.002 | 0.012 |
| Miscellaneous               | Plant-Prokaryote comparative genomics | COG0277                                            | 0.039 | 0.020 | 0.021 |
| Miscellaneous               | Plant-Prokaryote comparative genomics | Omega-amidase KE2                                  | 0.608 | 0.609 | 0.743 |
| Motility and Chemotaxis     | -                                     | -                                                  | 0.867 | 0.762 | 0.632 |
| Motility and Chemotaxis     | Flagellar motility in Prokaryota      | -                                                  | 0.442 | 0.389 | 0.303 |
| Motility and Chemotaxis     | Flagellar motility in Prokaryota      | Flagellum                                          | 0.255 | 0.218 | 0.170 |
| Nitrogen Metabolism         | -                                     | Allantoin Utilization                              | 0.039 | 0.023 | 0.032 |
| Nitrogen Metabolism         | -                                     | Ammonia assimilation                               | 0.442 | 0.424 | 0.344 |
| Nitrogen Metabolism         | -                                     | Nitrosative stress                                 | 0.041 | 0.053 | 0.068 |
| Nucleosides and Nucleotides | -                                     | -                                                  | 3.820 | 4.248 | 4.509 |
| Nucleosides and Nucleotides | -                                     | Pseudouridine Metabolism                           | 0.013 | 0.012 | 0.030 |
| Nucleosides and Nucleotides | Purines                               | -                                                  | 2.042 | 2.304 | 2.469 |
| Nucleosides and Nucleotides | Purines                               | De Novo Purine Biosynthesis                        | 0.793 | 0.904 | 1.055 |
| Nucleosides and Nucleotides | Pyrimidines                           | -                                                  | 1.113 | 1.252 | 1.281 |
| Nucleosides and Nucleotides | Pyrimidines                           | De Novo Pyrimidine Synthesis                       | 0.644 | 0.768 | 0.824 |

|                                                          |                                        |                                             |       |       |        |
|----------------------------------------------------------|----------------------------------------|---------------------------------------------|-------|-------|--------|
| Phages, Prophages,<br>Transposable elements,<br>Plasmids | Plasmid related functions              | -                                           | 0.022 | 0.015 | 0.024  |
| Phages, Prophages,<br>Transposable elements,<br>Plasmids | Plasmid related functions              | Rolling-circle replication                  | 0.021 | 0.014 | 0.023  |
| Phosphorus Metabolism                                    | -                                      | Phosphonate metabolism                      | 0.020 | 0.013 | 0.014  |
| Protein Metabolism                                       | -                                      | -                                           | 9.280 | 9.651 | 10.547 |
| Protein Metabolism                                       | Protein biosynthesis                   | -                                           | 6.541 | 6.849 | 7.776  |
| Protein Metabolism                                       | Protein biosynthesis                   | Ribosome LSU bacterial                      | 0.569 | 0.671 | 0.754  |
| Protein Metabolism                                       | Protein biosynthesis                   | Ribosome SSU bacterial                      | 0.349 | 0.407 | 0.511  |
| Protein Metabolism                                       | Protein biosynthesis                   | Single-copy ribosomal proteins              | 0.579 | 0.584 | 0.706  |
| Protein Metabolism                                       | Protein biosynthesis                   | Translation elongation factor G<br>family   | 0.155 | 0.135 | 0.218  |
| Protein Metabolism                                       | Protein biosynthesis                   | Translation elongation factors<br>bacterial | 0.211 | 0.213 | 0.295  |
| Protein Metabolism                                       | Protein biosynthesis                   | tRNA aminoacylation, Asp and<br>Asn         | 0.196 | 0.230 | 0.261  |
| Protein Metabolism                                       | Protein biosynthesis                   | Universal GTPases                           | 0.697 | 0.754 | 0.900  |
| Protein Metabolism                                       | Protein processing and<br>modification | FeFe hydrogenase maturation                 | 0.017 | 0.025 | 0.048  |

|                               |                                     |                                                              |       |       |       |
|-------------------------------|-------------------------------------|--------------------------------------------------------------|-------|-------|-------|
| Protein Metabolism            | Protein processing and modification | N-linked Glycosylation in Bacteria                           | 0.152 | 0.166 | 0.217 |
| Protein Metabolism            | Protein processing and modification | SCIFF peptide maturase system                                | 0.010 | 0.020 | 0.027 |
| Regulation and Cell signaling | -                                   | -                                                            | 2.016 | 1.816 | 1.628 |
| Regulation and Cell signaling | -                                   | cAMP signaling in bacteria                                   | 0.546 | 0.501 | 0.355 |
| Regulation and Cell signaling | -                                   | HPr catabolite repression system                             | 0.042 | 0.039 | 0.043 |
| Regulation and Cell signaling | -                                   | Sex pheromones in Enterococcus faecalis and other Firmicutes | 0.107 | 0.079 | 0.132 |
| Respiration                   | -                                   | -                                                            | 4.500 | 4.582 | 4.195 |
| Respiration                   | -                                   | Biogenesis of cbb3-type cytochrome c oxidases                | 0.032 | 0.020 | 0.031 |
| Respiration                   | -                                   | Quinone oxidoreductase family                                | 0.092 | 0.058 | 0.032 |
| Respiration                   | ATP synthases                       | -                                                            | 0.506 | 0.577 | 0.701 |
| Respiration                   | ATP synthases                       | V-Type ATP synthase                                          | 0.070 | 0.104 | 0.190 |
| Respiration                   | Electron donating reactions         | -                                                            | 1.785 | 1.836 | 1.510 |
| Respiration                   | Electron donating reactions         | CO Dehydrogenase                                             | 0.213 | 0.118 | 0.074 |
| Respiration                   | Electron donating reactions         | Na(+)-translocating NADH-quinone oxidoreductase and          | 0.143 | 0.166 | 0.266 |

|                |                                 |                                                                                      |       |       |       |
|----------------|---------------------------------|--------------------------------------------------------------------------------------|-------|-------|-------|
|                |                                 | rnf-like group of electron transport complexes                                       |       |       |       |
| Respiration    | Electron donating reactions     | Respiratory Complex I                                                                | 0.731 | 0.793 | 0.402 |
| Respiration    | Reverse electron transport      | -                                                                                    | 0.010 | 0.014 | 0.015 |
| Respiration    | Reverse electron transport      | Archaeal membrane bound hydrogenases                                                 | 0.005 | 0.007 | 0.008 |
| Respiration    | Reverse electron transport      | Energy conserving hydrogenase b, Methanococcales- Methanobacteriales- Methanopyrales | 0.002 | 0.001 | 0.005 |
| Respiration    | Sodium Ion-Coupled Energetics   | -                                                                                    | 0.034 | 0.075 | 0.058 |
| Respiration    | Sodium Ion-Coupled Energetics   | Na+ translocating decarboxylases and related biotin-dependent enzymes                | 0.027 | 0.075 | 0.057 |
| RNA Metabolism | RNA processing and modification | Polyadenylation bacterial                                                            | 0.113 | 0.205 | 0.193 |
| RNA Metabolism | RNA processing and modification | t(6)A synthesis in bacteria                                                          | 0.014 | 0.014 | 0.025 |

|                            |                                                                            |                                                                   |       |       |       |
|----------------------------|----------------------------------------------------------------------------|-------------------------------------------------------------------|-------|-------|-------|
| RNA Metabolism             | RNA processing and modification                                            | Threonylcarbamoyladenosine                                        | 0.017 | 0.021 | 0.026 |
| RNA Metabolism             | Transcription                                                              | RNA polymerase bacterial                                          | 0.485 | 0.572 | 0.657 |
| Secondary Metabolism       | -                                                                          | -                                                                 | 0.095 | 0.056 | 0.052 |
| Secondary Metabolism       | Biologically active compounds in metazoan cell defence and differentiation | -                                                                 | 0.045 | 0.017 | 0.020 |
| Secondary Metabolism       | Biologically active compounds in metazoan cell defence and differentiation | Steroid sulfates                                                  | 0.045 | 0.017 | 0.020 |
| Stress Response            | Acid stress                                                                | -                                                                 | 0.013 | 0.000 | 0.009 |
| Stress Response            | Acid stress                                                                | Glutamate transporter involved in acid tolerance in Streptococcus | 0.013 | 0.000 | 0.009 |
| Stress Response            | Oxidative stress                                                           | Oxygen stress response / Human gut microbiome                     | 0.021 | 0.029 | 0.037 |
| Stress Response            | Oxidative stress                                                           | Redox-dependent regulation of nucleus processes                   | 0.078 | 0.093 | 0.120 |
| Sulfur Metabolism          | Organic sulfur assimilation                                                | Alkanesulfonate assimilation                                      | 0.236 | 0.162 | 0.145 |
| Transcriptional regulation | -                                                                          | -                                                                 | 0.161 | 0.133 | 0.188 |
| Transcriptional regulation | -                                                                          | CarD                                                              | 0.161 | 0.133 | 0.188 |

|           |                                               |                                                                                                     |       |       |       |
|-----------|-----------------------------------------------|-----------------------------------------------------------------------------------------------------|-------|-------|-------|
| Virulence | -                                             | Mycobacterium virulence operon involved in an unknown function with a Jag Protein and YidC and YidD | 0.075 | 0.045 | 0.077 |
| Virulence | -                                             | Mycobacterium virulence operon involved in protein synthesis (SSU ribosomal proteins)               | 0.206 | 0.204 | 0.280 |
| Virulence | Resistance to antibiotics and toxic compounds | -                                                                                                   | 3.059 | 2.906 | 2.555 |
| Virulence | Resistance to antibiotics and toxic compounds | Cadmium resistance                                                                                  | 0.014 | 0.018 | 0.031 |
| Virulence | Resistance to antibiotics and toxic compounds | Mycobacterial MmpL3 membrane protein cluster                                                        | 0.005 | 0.008 | 0.013 |
| Virulence | Resistance to antibiotics and toxic compounds | Resistance to fluoroquinolones                                                                      | 0.290 | 0.350 | 0.400 |

---
